# Supplementary material for: The amino acid tryptophan prevents the biosynthesis of dermatan sulfate
Source: Royal Society of Chemistry journal article supplement (doi:10.1039/c1mb05139c), 2011-07-26
Supplement: c1mb05139c.pdf [file c1mb05139c.pdf]

**Supplementary TABLE I**

Overview of recombinant proteins. In all chimeric proteins the numbering of amino acids is based on the sequence of the construct and not on the sequence of the natural precursor proteins.

| <b>Construct</b>                 | <b>DCN moiety</b> | <b>CSF-1 moiety</b> | <b>Primer sense</b>   | <b>Primer rev</b>         |
|----------------------------------|-------------------|---------------------|-----------------------|---------------------------|
| DCN-Flag                         | M1 - K359         |                     | DCN-EcoRI             | DCN-flag.rev              |
| S222A-HA                         | M1 - Q153         | L241 - S353         | DCN-EcoRI             | S222A-HA.rev              |
| G203                             | M1 - Q153         | L241 - G290         | G203.for              | G203.rev                  |
| M212                             | M1 - Q153         | L241 – M299         | DCN-EcoRI             | M212.rev                  |
| A222                             | M1 - Q153         | L241 – A309         | DCN-EcoRI             | A222.rev                  |
| DCN <sup>M1-Q153</sup> TNWVP     | M1 - Q153         |                     | DCN-EcoRI             | TNWVP.rev                 |
| DCN <sup>M1-Q153</sup> PQGTEL    | M1 - Q153         |                     | DCN-EcoRI             | PQGTEL.rev                |
| DCN <sup>M1-Q153</sup> G203-P231 | M1 – Q153         | G290-P318           | DCN-EcoRI<br>G203.for | G203-Q153.rev<br>P231.rev |
| S222A <sup>W216L</sup>           | M1 - Q153         | L241 – S353         | Trp216.for            | Trp216.rev                |
| W216L-Flag                       | M1 - Q153         | L241 - P318         | DCN-EcoRI             | W216L-flag.rev            |
